# Supplementary material
Source: MDPI journal article supplement (https://www.mdpi.com/2073-445X/11/11/1910)
Supplement: s1 [file s1]

**Table S1.** Statistical table of types and numbers of epigeic arthropods.

| Epigeic arthropods type |             |            |                                   | Code | Group         | Number | Dominance |
|-------------------------|-------------|------------|-----------------------------------|------|---------------|--------|-----------|
| Insecta                 | Orthoptera  | Gryllidae  | Teleogryllus emma                 | G1   | Herbivore     | 1494   | +++       |
| Insecta                 | Orthoptera  | Gryllidae  | Loxoblemmus doenitzi              | G2   | Herbivore     | 3497   | +++       |
| Arachnida               | Araneae     | Opiliones  | Phalangodidae                     | G3   | Natural enemy | 239    | ++        |
| Arachnida               | Araneae     | Agelenidae | Funnel weaver                     | G4   | Natural enemy | 132    | ++        |
| Insecta                 | Hymenoptera | Formicidae | Camponotus japonicus              | G5   | Neutral       | 321    | ++        |
| Insecta                 | Hymenoptera | Formicidae | Formica japonica                  | G6   | Neutral       | 162    | ++        |
| Insecta                 | Coleoptera  | Carabidae  | Dolichopus halensis               | G7   | Natural enemy | 240    | ++        |
| Insecta                 | Coleoptera  | Carabidae  | Amara macronota                   | G8   | Natural enemy | 48     | +         |
| Insecta                 | Coleoptera  | Carabidae  | Harpalus sinicus                  | G9   | Natural enemy | 32     | +         |
| Insecta                 | Coleoptera  | Carabidae  | Amara brevicollis                 | G10  | Natural enemy | 1216   | +++       |
| Insecta                 | Coleoptera  | Carabidae  | Chlaenius micans                  | G11  | Natural enemy | 187    | ++        |
| Insecta                 | Coleoptera  | Carabidae  | Isiocarabus fiduciarius<br>Thorns | G12  | Natural enemy | 4      | +         |
| Insecta                 | Coleoptera  | Carabidae  | Pheropsophus occipitalis          | G13  | Natural enemy | 24     | +         |
| Insecta                 | Coleoptera  | Carabidae  | Harpalus griseus                  | G14  | Natural enemy | 3      | +         |

|           |                |                   |                                      |     |               |    |   |
|-----------|----------------|-------------------|--------------------------------------|-----|---------------|----|---|
| Diplopoda | Polydesmida    | Brolemann         | Prospirobolus joannsi                | G15 | Herbivore     | 73 | + |
| Diplopoda | Polydesmida    | Paradoxosomatidae | Orthomorpha coarctata                | G16 | Herbivore     | 8  | + |
| Insecta   | Coleoptera     | Hydrophilidae     | Hydrophilus acuminatus Motschulsky   | G17 | Natural enemy | 1  | + |
| Insecta   | Coleoptera     | Carabidae         | Chlaenius prostenus                  | G18 | Natural enemy | 1  | + |
| Chilopoda | Scolopendridae | Scolopendridae    | Scolopendridae                       | G19 | Natural enemy | 12 | + |
| Insecta   | Coleoptera     | Carabidae         | Harpalus calceatus                   | G20 | Natural enemy | 53 | + |
| Insecta   | Coleoptera     | Carabidae         | Harpalus pallidipennis               | G21 | Natural enemy | 22 | + |
| Arachnida | Theridiidae    | Theridiidae       | Theridiidae                          | G22 | Herbivore     | 10 | + |
| Insecta   | Coleoptera     | Tenebrionidae     | Gonocephalum reticulatum Motschulsky | G23 | Herbivore     | 44 | + |
| Insecta   | Orthoptera     | Acrididae         | Atractomorpha sinensis Bolvar        | G24 | Herbivore     | 6  | + |
| Crustacea | Isopoda        | Oniscidae         | Porcellio                            | G25 | Herbivore     | 9  | + |
| Insecta   | Coleoptera     | Staphylinidae     | Pinophilus punctatissimus            | G26 | Natural enemy | 6  | + |
| Insecta   | Rhynchota      | Aradidae          | flat bug                             | G27 | Herbivore     | 1  | + |
| Insecta   | Orthoptera     | Catantopidae      | Shirakiacris shirakii                | G28 | Herbivore     | 5  | + |
| Insecta   | Coleoptera     | Chrysomelidae     | Monolepta hieroglyphica              | G29 | Herbivore     | 30 | + |

|         |            |               |                             |     |                  |     |    |
|---------|------------|---------------|-----------------------------|-----|------------------|-----|----|
| Insecta | Coleoptera | Carabidae     | Harpalus<br>rubefactus      | G30 | Natural<br>enemy | 149 | ++ |
| Insecta | Orthoptera | Acrididae     | Haplotropis<br>brunneriana  | G31 | Herbivore        | 4   | +  |
| Insecta | Orthoptera | Grylloidea    | Gryllotalpas<br>pps         | G32 | Herbivore        | 1   | +  |
| Insecta | Rhynchota  | Plataspidae   | Coptosoma<br>bifaria        | G33 | Herbivore        | 1   | +  |
| Insecta | Coleoptera | Nicrophorus   | Nicrophorus<br>nepalensis   | G34 | Neutral          | 1   | +  |
|         |            |               | Hope                        |     |                  |     |    |
| Insecta | Coleoptera | Carabidae     | Scarites<br>terricola       | G35 | Natural<br>enemy | 1   | +  |
|         |            |               | Bonelli                     |     |                  |     |    |
| Insecta | Coleoptera | Carabidae     | Calosoma<br>maximoviczi     | G36 | Natural<br>enemy | 2   | +  |
| Insecta | Coleoptera | Staphylinidae | Staphylinida<br>e           | G37 | Natural<br>enemy | 1   | +  |
| Insecta | Orthoptera | Acrididae     | Traulia<br>orientalis       | G38 | Herbivore        | 1   | +  |
|         |            |               | Ramme                       |     |                  |     |    |
| Insecta | Coleoptera | Scarabaeidae  | Onthophagu<br>s             | G39 | Natural<br>enemy | 2   | +  |
| Insecta | Coleoptera | Aphodiidae    | Aphodius sp                 | G40 | Herbivore        | 1   | +  |
| Insecta | Orthoptera | Acrididae     | Chrysacris<br>liaoningensis | G41 | Herbivore        | 1   | +  |
|         |            |               | Zheng                       |     |                  |     |    |
| Insecta | Coleoptera | Scarabaeidae  | shining<br>leafchafer       | G42 | Herbivore        | 3   | +  |
| Insecta | Coleoptera | Staphylinidae | Paederus<br>tamulus         | G43 | Natural<br>enemy | 14  | +  |
|         |            |               | Erichson                    |     |                  |     |    |
| Insecta | Coleoptera | Carabidae     | Harpalus<br>roninus         | G44 | Natural<br>enemy | 1   | +  |
| Insecta | Homoptera  | Cicadellidae  | Singapora<br>shinshana      | G45 | Herbivore        | 1   | +  |

|         |            |              |                                      |     |                  |   |   |
|---------|------------|--------------|--------------------------------------|-----|------------------|---|---|
| Insecta | Orthoptera | Epacromius   | Epacromius<br>coerulipes             | G46 | Herbivore        | 2 | + |
| Insecta | Rhynchota  | Nabis        | Nabis<br>stenoferus<br>Hsiao         | G47 | Natural<br>enemy | 1 | + |
| Insecta | Coleoptera | Scarab       | Pentodon<br>patruelis<br>Frivaldszky | G48 | Herbivore        | 1 | + |
| Insecta | Rhynchota  | Nepidae      | Nepa<br>chinensis<br>Hoff            | G49 | Herbivore        | 1 | + |
| Insecta | Coleoptera | Carabidae    | Chlaenius<br>juncus                  | G50 | Natural<br>enemy | 1 | + |
| Insecta | Coleoptera | Scarabaeidae | Geotrupidae                          | G51 | Natural<br>enemy | 2 | + |
| Insecta | Coleoptera | Carabidae    | Panagaeus<br>Latreille               | G52 | Natural<br>enemy | 2 | + |

**Note:** '+' represents the proportion of individuals in total catch. '+++' means more than 10 %. '++' means 1 % ~ 10 %. '+' means less than 1 %.

**Table S2.** Statistical table of herb vegetation.

| Herb Vegetation |                   |                               | Latin Names                                        | Code |
|-----------------|-------------------|-------------------------------|----------------------------------------------------|------|
| Monocots        | Poales Small      | Poaceae Barnhart              | <i>Digitaria sanguinalis</i> (L.) Scop.            | SP1  |
|                 |                   |                               | <i>Chloris virgata</i> Sw.                         | SP2  |
|                 |                   |                               | <i>Setaria viridis</i> (L.) Beauv.                 | SP3  |
|                 |                   |                               | <i>Echinochloa crusgalli</i> (L.) Beauv.           | SP4  |
|                 |                   |                               | <i>Eleusine indica</i> (L.) Gaertn.                | SP5  |
|                 | Cyperales         | Cyperaceae Juss.              | <i>Carex</i> L.                                    | SP6  |
|                 |                   |                               | <i>Cyperus rotundus</i> L.                         | SP7  |
|                 | Powdery endosperm | Commelinaceae Mirb.           | <i>Commelina communis</i> L.                       | SP8  |
|                 | Campanulales      | Asteraceae Bercht. & J. Presl | <i>Kalimeris indica</i> (L.) Sch. Bip.             | SP9  |
|                 |                   |                               | <i>Artemisia mongolica</i> (Fisch. ex Bess.) Nakai | SP10 |
|                 |                   |                               | <i>Aster tataricus</i> L. f.                       | SP11 |
|                 |                   |                               | <i>Artemisia caruifolia</i> Buch.-Ham. ex Roxb.    | SP12 |
|                 |                   |                               | <i>Artemisia capillaris</i> Thunb.                 | SP13 |
|                 |                   |                               | <i>Helianthus tuberosus</i> L.                     | SP14 |
|                 |                   |                               |                                                    |      |

|                                         |                               |                                     |      |
|-----------------------------------------|-------------------------------|-------------------------------------|------|
|                                         |                               | Cirsium japonicum Fisch. ex DC.     | SP15 |
| Polygonales                             | Polygonaceae Juss.            | Polygonum lapathifolium L.          | SP16 |
|                                         |                               | Polygonum aviculare L.              | SP17 |
| Tubiflorae                              | Scrophulariaceae              | Veronica persica Poir.              | SP18 |
|                                         | Lamiaceae                     | Leonurus japonicus Houttuyn         | SP19 |
| Asterales Link                          | Asteraceae Bercht. & J. Presl | Bidens pilosa L.                    | SP20 |
| Contortae                               | Asclepiadaceae                | Metaplexis japonica (Thunb.) Makino | SP21 |
| Lamiales                                | Boraginaceae                  | Thyrocarpus sampsonii Hance         | SP22 |
| Rutales                                 | Polygalaceae                  | Polygala tenuifolia Willd.          | SP23 |
| Caryophyllales                          | Amaranthaceae                 | Herba seu Radix Amaranthi           | SP24 |
| Urticales                               | Moraceae Gaudich.             | Humulus scandens (Lour.) Merr.      | SP25 |
| Malvales Juss. ex Bercht. & J. Presl    | Malvaceae Juss.               | Abutilon theophrasti Medicus        | SP26 |
| Centrospermae                           | Chenopodiaceae                | Kochia scoparia (L.) Schrad.        | SP27 |
|                                         | Rubiaceae                     | Rubia cordifolia L.                 | SP28 |
| Santalales R. Br. ex Bercht. & J. Presl | Santalaceae R. Br.            | Thesium chinense Turcz.             | SP29 |
| Sphenopsida                             | Equisetales                   | Equisetum arvense L.                | SP30 |
|                                         |                               | DC.                                 |      |

|            |            |                     |                      |      |
|------------|------------|---------------------|----------------------|------|
| Gnetopsida | Ephedrales | Ephedraceae Dumort. | Ephedra sinica Stapf | SP31 |
|------------|------------|---------------------|----------------------|------|

---

All plants were identified to the species level, and all species information in the three quadrats was merged. To assess this, the variance inflation factor (VIF) was calculated for each predictor variable. No collinearity was detected ( $VIF < 5$ ).

**Text S1.** Five types of field margin typical characteristics

1. Grassland (GL)

Grassland is mainly a linear semi-natural habitat with a width of 4-10m between farmland and farmland. Field visually estimated vegetation cover of Grassland from 80% to 92%, the canopy density of the tree layer is 0. The vegetation community was dominated by weeds. The dominant vegetations mainly consisted of *Eleusine indica* (L.) Gaertn., *Digitaria sanguinalis* (L.) Scop., and *Setaria viridis* (L.) Beauv.

2. Woodland (WL)

Woodland is mainly semi-natural field margin with a width of 4-10m usually between roads and farmland or between farmland and farmland. Field visually estimated vegetation cover of Woodland from 70% to 85%, and the canopy density of the tree layer is about 92%. The vegetation community was dominated by natural vegetation and artificially planted poplar forest. The dominant herbaceous vegetations mainly consisted of *Digitaria sanguinalis* (L.) Scop., *Polygonum aviculare* L., and *Bidens pilosa* L.

3. Irrigation canal and ditch (CD)

Irrigation canal and ditch is mainly a linear semi-natural habitat less than 10m in width. Field visually estimated vegetation cover of Irrigation canal and ditch from 50% to 73%, the canopy density of the tree layer is about 65%. The vegetation community was dominated by natural vegetation. The dominant herbaceous vegetations mainly consisted of *Setaria viridis* (L.) Beauv., *Echinochloa crusgalli* (L.) Beauv., *Humulus scandens* (Lour.) Merr.

4. Dirt road (DR)

Dirt road is mainly a linear artificial field margin with a width of 2-4m between farmland and farmland. Field visually estimated vegetation cover of Dirt road from 50% to 60%, and the canopy density of the tree layer is about 53%. The vegetation community was dominated by single vegetation structure. The dominant herbaceous vegetations mainly consisted of *Echinochloa crusgalli* (L.) Beauv., *Carex* L., and *Bidens pilosa* L.

5. Paved road (PR)

Paved road is mainly a linear artificial field margin with a width of 2-4m between farmland and farmland. Field visually estimated vegetation cover of Paved road from 45% to 55%, and the canopy density of the tree layer is about 50%. The vegetation community was dominated by weeds. The dominant herbaceous vegetations mainly consisted of *Digitaria sanguinalis* (L.) Scop., *Aster tataricus* L. f., and *Kalimeris indica* (L.) Sch. Bip.
